# Supplementary material
Source: PubMed Central journal article supplement (PMC4209203)
Supplement: NIHMS606692-supplement-2.pdf [file NIHMS606692-supplement-2.pdf]

| <b>Supplementary Table 1. Primer sets</b> |                          |
|-------------------------------------------|--------------------------|
| <b><i>mouse cDNA primers</i></b>          | <b><i>Sequence</i></b>   |
| Utx-F                                     | TCCAAGACCACCATCCTCAC     |
| Utx-R                                     | GGAGGAAAGAAAGCATCACG     |
| Jmjd3-F                                   | ACGAGCCTGCCTACTACTGC     |
| Jmjd3-R                                   | CTCGCAGTGCACCAGGTA       |
| Hes1-F                                    | GCGAAGGGCAAGAATAAATG     |
| Hes1-R                                    | TGTCTGCCTTCTCTAGCTTGG    |
| Il7ra-F                                   | CATTTCACTCGTAAAAGAGCCC   |
| Il7ra-R                                   | TGGAAGTGGATGGAAGTCAA     |
| Suz12-F                                   | TGATGGCTTATCATTTTTGTGG   |
| Suz12-R                                   | GAGAAAATGAAAGGAGAGCAAGA  |
|                                           |                          |
| <b><i>mouse ChIP Primers</i></b>          |                          |
| Hes1 promoter-F                           | AAGTTTCACACGAGCCGTTTC    |
| Hes1 promoter-R                           | TGTATCAGCACCAGCTCCA      |
| Jmjd3 promoter-F                          | CGCAGCTTCCCAGAAGTTAG     |
| Jmjd3 promoter-R                          | ACCAAGTTCCTCCAGCTCCT     |
|                                           |                          |
| <b><i>human cDNA primers</i></b>          |                          |
| NRARP-F                                   | CGCTGTGCTGGTGTCTAA       |
| NRARP-R                                   | CATTGACCACGCAGTGTTTT     |
| NOTCH1-F                                  | CGGGGCTAACAAAGATATGC     |
| NOTCH1-R                                  | AGTGGTCCAGCAGCACCTT      |
| MYC-F                                     | GCTGCTTAGACGCTGGATTT     |
| MYC-R                                     | CGAGGTCATAGTTCCTGTTGG    |
| MAZ-F                                     | GACCACATGAAGGTGCACAG     |
| MAZ-R                                     | GTCCTTACC CGTGGAT        |
| HEY1-F                                    | ATTTTGCCAGAAAAAGACG      |
| HEY1-R                                    | CTGGGTACCAGCCTTCTCAG     |
| JMJD3-F                                   | GGGAAGAAAATCGCTTACCAG    |
| JMJD3-R                                   | TCACTTGTACGAACAGGATG     |
| UTX-F                                     | ACTTGGAAAAC TTTGTGGTGTCT |
| UTX-R                                     | CAAGATGAGGCGGATGGTA      |
|                                           |                          |
| <b><i>human ChIP primers</i></b>          |                          |
| NRARP locus-F                             | ACCAACTGCGAGTTCAACG      |
| NRARP locus-R                             | TTGACCAGCAGCTTACAG       |
| NOTCH1 locus-1F                           | CAGACACTTTGAAGCCCTCAG    |
| NOTCH1 locus-1R                           | CGCCTTTGTGCTTCTGTCT      |
| NOTCH1 locus-2F                           | CCTCCTCTTCCCTCGTGT       |
| NOTCH1 locus-2R                           | CAGACTGAGCACCCGTCTCT     |
| NOTCH1 locus-3F                           | AGGCTGGCAGCTCTATTACAG    |
| NOTCH1 locus-3R                           | CGTGGCAGAGTCTGGAAGT      |
| MYC locus 1F                              | GGTCCGACATTCTGCTTTA      |
| MYC locus 1R                              | CAAGGAGCTCAGGATGCAA      |
| MAZ locus-1F                              | GTCTCCCTCCCTCCTGTGT      |
| MAZ locus-1R                              | AAATTTGAAAAGGCGGAGTG     |
| MAZ locus-2F                              | ATCTTCGGGGAACGACTCA      |
| MAZ locus-2R                              | CTTCGGCTTCCGCTTTTT       |
| HEY1 locus-F                              | TGGGGACATGGAACCTAGAG     |
| HEY1 locus-R                              | GCGACCTCTCAGATCACCTC     |
| RBBP6 locus-1F                            | TATGGTGCTGGTGGCTGTTA     |
| RBBP6 locus-1R                            | GCTGCTGCTTCCAATAAACTG    |
| RBBP6 locus-2F                            | TGAGCCTGGCAATGTTGTTA     |
| RBBP6 locus-2R                            | CCGCTGCCAAGAAGTATA       |
| JMJD3 locus (NFkB binding) 2.1AF          | GTGGGCTGAGGAGTTGTGTC     |
| JMJD3 locus (NFkB binding) 2.1AR          | CCAGAAAACCTTCCCCTCTT     |
| JMJD3 locus (NFkB binding) 2.1BF          | GTGGGCTGAGGAGTTGTGTC     |
| JMJD3 locus (NFkB binding) 2.1BR          | CGTGAGTCACCCAGAAAACC     |

| <b>Supplementary Table 2. Details on the frameshift mutations identified in pediatric T-ALL (Sanger sequencing)</b> |
|---------------------------------------------------------------------------------------------------------------------|
| flanking sequence[wt sequence>mutant sequence]flanking sequence                                                     |
| SJTALL037: R1111fs, TGCTTTGTG[C----->GGGGCGTAA]GTGTCGTATC                                                           |
| SJTALL177: V1113fs, GTGCGTGTGG[----->GGTGTGG]TATCAGCAGG                                                             |
| SJTALL189: V1112fs, TTGTGCGTGT[CGTATCA-->GGCTAATAG]CAGGAAATCT                                                       |

**Supplementary Table 3. Overlap between gene expression changes in knock-downs, GSKJ4 and Utx knockout genotype**

| GENES | LIST-A | LIST-B | INTERSECTION | EXPECTED | P-VALUE  | LIST-A                       | LIST-B                           |
|-------|--------|--------|--------------|----------|----------|------------------------------|----------------------------------|
| 20414 | 749    | 3682   | 373          | 135.1    | 6.53E-91 | <i>shJMJD3</i> specific.down | <i>CEM shJMJD3</i> specific.down |
| 20414 | 297    | 1636   | 62           | 23.8     | 2.01E-12 | <i>shJMJD3</i> specific.up   | <i>CEM shJMJD3</i> specific.up   |
| 20414 | 749    | 486    | 97           | 17.8     | 4.88E-44 | <i>shJMJD3</i> specific.down | GSKJ4 vs untreated.down          |
| 20414 | 297    | 486    | 17           | 7.1      | 8.18E-04 | <i>shJMJD3</i> specific.up   | GSKJ4 vs untreated.down          |
| 20414 | 749    | 1751   | 74           | 64.2     | 1.11E-01 | <i>shJMJD3</i> specific.down | GSKJ4 vs untreated.up            |
| 20414 | 297    | 1751   | 79           | 25.5     | 2.57E-20 | <i>shJMJD3</i> specific.up   | GSKJ4 vs untreated.up            |
| 20414 | 46     | 486    | 7            | 1.1      | 9.95E-05 | <i>shUTX</i> specific.down   | GSKJ4 vs untreated.down          |
| 20414 | 189    | 486    | 24           | 4.5      | 2.51E-11 | <i>shUTX</i> specific.up     | GSKJ4 vs untreated.down          |
| 20414 | 46     | 1751   | 11           | 3.9      | 1.43E-03 | <i>shUTX</i> specific.down   | GSKJ4 vs untreated.up            |
| 20414 | 189    | 1751   | 29           | 16.2     | 1.54E-03 | <i>shUTX</i> specific.up     | GSKJ4 vs untreated.up            |
| 20414 | 1472   | 486    | 48           | 35       | 1.66E-02 | <i>UTXKO</i> down            | GSKJ4.down                       |
| 20414 | 1789   | 486    | 83           | 42.6     | 2.49E-09 | <i>UTXKO</i> up              | GSKJ4.down                       |
| 20414 | 1472   | 1751   | 167          | 126.3    | 8.95E-05 | <i>UTXKO</i> down            | GSKJ4.up                         |
| 20414 | 1789   | 1751   | 210          | 153.5    | 1.02E-06 | <i>UTXKO</i> up              | GSKJ4.up                         |

| <b>Supplementary Table 4. Reproducibility Summary of High-throughput Sequencing data</b> |                                                |
|------------------------------------------------------------------------------------------|------------------------------------------------|
| <b>RNA-Seq reproducibility Summary</b>                                                   | <b><i>Spearman correlation coefficient</i></b> |
| CUTLL1.GSKJ4_24h                                                                         | 0.915                                          |
| CUTLL1.GSKJ4_48h                                                                         | 0.91                                           |
| CUTLL1.GSKJ4_72h                                                                         | 0.916                                          |
| CUTLL1sh <i>Renilla</i>                                                                  | 0.845                                          |
| CUTLL1.sh <i>JMJD3</i>                                                                   | 0.834                                          |
| CUTLL1.sh <i>UTX</i>                                                                     | 0.91                                           |
| CEM.sh <i>Renilla</i>                                                                    | 0.923                                          |
| CEM.sh <i>JMJD3</i>                                                                      | 0.916                                          |
| CEM.sh <i>UTX</i>                                                                        | 0.925                                          |
|                                                                                          | 0.753                                          |
| <b>ChIP-Seq reproducibility Summary</b>                                                  |                                                |
|                                                                                          | <b><i>genome-wide analysis</i></b>             |
| CUTLL1-H3K27me3-sh <i>JMJD3</i>                                                          | 0.642                                          |
| CUTLL1-H3K27me3-GSKJ4_6h                                                                 | 0.68                                           |
| CUTLL1-H3K27me3-sh <i>Renilla</i>                                                        | 0.716                                          |
|                                                                                          |                                                |
|                                                                                          |                                                |
|                                                                                          | <b><i>TSS-based analysis</i></b>               |
| CUTLL1-H3K27me3-sh <i>Renilla</i>                                                        | 0.852                                          |
| CUTLL1-H3K27me3-sh <i>JMJD3</i>                                                          | 0.85                                           |
| CUTLL1-H3K27me3-GSKJ4_6h                                                                 | 0.827                                          |
| CUTLL1-JMJD3-GSKJ5 (control)                                                             | 0.753                                          |
